# Supplementary material
Source: publisher site journal article supplement (https://www.dovepress.com/article/339919)
Supplement: Supplementary file 1 [file get_supplementary_file.php]

**Supplementary TableS1.** Clinical characteristics of the patients in TCGA, GSE20685 and GSE6532 datasets

| **Factor** | **Subgroup** | **TCGA** | **GSE20685** | **GSE6532** |
| --- | --- | --- | --- | --- |
| **N(%)**  **(n=390)** | **N(%)**  **(n=131)** | **N(%)**  **(n=119)** |
| Age | >40 | 21(5.4) | 25(19.1) | 5(4.2) |
| 40-59 | 177(45.4) | 88(67.2) | 66(55.5) |
| ≥60 | 192(49.2) | 18(13.7) | 48(40.3) |
| Tumor size | T1 | 138(35.4) | 65(49.6) | 71(59.7) |
| T2 | 224(57.4) | 65(49.6) | 47(39.5) |
| T3 | 28(7.2) | 1(0.8) | 1(0.8) |
| Stage | I | 138(35.4) | 65(49.6) | 71(59.7) |
| II | 252(64.6) | 66(50.4) | 48(40.3) |
| Pam50 | Basal | 85(21.8) | 25(19.1) |  |
| Her2 | 42(10.8) | 21(16.0) |  |
| LumA | 78(20.0) | 51(38.9) |  |
| LumB | 175(44.9) | 29(22.2) |  |
| Normal | 10(2.5) | 5(3.8) |  |

**Supplementary Table S2.** Clinical characteristics of the patients with metastasis within 3 years, metastasis after 3 years and non-metastasis in TCGA and GSE20685 datasets

| **Feature** | **Subgroup** | **TCGA(n=181)** | | | **GSE20685(n=129)** | | |
| --- | --- | --- | --- | --- | --- | --- | --- |
| **Metastasis within 3 years** | **Metastasis after 3 years** | **Non-metastasis** | **Metastasis within 3 years** | **Metastasis after 3 years** | **Non-metastasis** |
| **N(%)**  **(n=18)** | **N(%)**  **(n=5)** | **N(%)**  **(n=158)** | **N(%)**  **(n=5)** | **N(%)**  **(n=7)** | **N(%)**  **(n=117)** |
| Age | <40 | 2(11.1) | 1(20.0) | 15(9.5) | 4(80.0) | 1(14.3) | 19(16.2) |
| 40-59 | 7(38.9) | 4(80.0) | 77(48.7) | 1(20.0) | 6(85.7) | 80(68.4) |
| ≥60 | 9(50.0) | 0(0.0) | 66(41.8) | 0(0.0) | 0(0.0) | 18(15.4) |
| Tumor size | T1 | 5(27.8) | 3(60.0) | 70(44.3) | 3(60.0) | 3(42.9) | 58(49.6) |
| T2 | 11(61.1) | 2(40.0) | 78(49.4) | 2(40.0) | 4(57.1) | 58(49.6) |
| T3 | 2(11.1) | 0(0.0) | 10(6.3) | 0(0.0) | 0(0.0) | 1(0.9) |
| Stage | I | 5(27.8) | 3(60.0) | 70(44.3) | 3(60.0) | 3(42.9) | 58(49.6) |
| II | 13(72.2) | 2(40.0) | 88(55.7) | 2(40.0) | 4(57.1) | 59(50.4) |
| Pam50 | Basal | 2(11.1) | 3(60.0) | 31(19.6) | 1(20.0) | 1(14.3) | 23(19.7) |
| Her2 | 2(11.1) | 1(20.0) | 19(12.0) | 0(0.0) | 1(14.3) | 19(16.2) |
| LumA | 2(11.1) | 1(20.0) | 39(24.7) | 1(20.0) | 1(14.3) | 49(41.9) |
| LumB | 10(55.6) | 0(0.0) | 64(40.5) | 3(60.0) | 4(57.1) | 21(17.9) |
| Normal | 2(11.1) | 0(0.0) | 5(3.2) | 0(0.0) | 0(0.0) | 5(4.3) |

**Supplementary Table S3.** Clinical characteristics of the patients in our tumor specimens.

| **Outcome** | **Number** | **Molecular subtypes** | **Surgery time (year)** | **Age** | **Stage** | **DMFS**  **(month)** | **Location of tumor metastasis** |
| --- | --- | --- | --- | --- | --- | --- | --- |
| Distant metastasis | cases 1 | LumA | 2013 | 71 | stage II | 48 | Liver |
| cases 2 | LumA | 2014 | 45 | stage II | 40 | Liver |
| cases 3 | LumB | 2014 | 48 | stage I | 14 | Liver |
| cases 4 | LumB | 2017 | 42 | stage I | 14 | Liver |
| cases 5 | LumB | 2013 | 71 | stage I | 55 | Lung |
| cases 6 | LumB | 2010 | 73 | stage II | 42 | Liver |
| cases 7 | Her2 | 2015 | 65 | stage I | 39 | Liver |
| cases 8 | Basal | 2014 | 66 | stage II | 59 | Lung |
| Non-metastasis | cases 9 | LumA | 2013 | 59 | stage II | 76 |  |
| cases 10 | LumA | 2013 | 43 | stage II | 94 |  |
| cases 11 | LumA | 2015 | 70 | stage II | 74 |  |
| cases 12 | LumA | 2015 | 52 | stage II | 60 |  |
| cases 13 | LumB | 2013 | 36 | stage II | 90 |  |
| cases 14 | LumB | 2014 | 55 | stage II | 79 |  |
| cases 15 | LumB | 2012 | 54 | stage I | 79 |  |
| cases 16 | LumB | 2013 | 67 | stage II | 76 |  |
| cases 17 | LumB | 2013 | 50 | stage I | 60 |  |
| cases 18 | LumB | 2013 | 51 | stage I | 69 |  |
| cases 19 | LumB | 2012 | 62 | stage I | 89 |  |
| cases 20 | LumB | 2014 | 53 | stage I | 86 |  |
| cases 21 | LumB | 2013 | 51 | stage I | 64 |  |
| cases 22 | Her2 | 2014 | 72 | stage I | 69 |  |
| cases 23 | Her2 | 2015 | 67 | stage I | 73 |  |
| cases 24 | Basal | 2013 | 70 | stage I | 72 |  |
| cases 25 | Basal | 2014 | 70 | stage I | 67 |  |

Samples matching: Cases 1-2 were paired with cases 9-12; Cases 3-6 were paired with cases 13-21; Cases 7 were paired with cases 22-23; Cases 8 were paired with cases 24-25

**Supplementary Table S4.** Correlation of *ADAMTS8* expression and clinical feature of the patients in our clinical samples of LN-negative early-stage IDC patients

| **Feature** | **Subgroup** | **Low**  **(n=13)** | **High**  **(n=12)** | ***p*a value** |
| --- | --- | --- | --- | --- |
| Age  N(%) | <40 | 0(0.0) | 1(0.0) | *p*=0.523 |
| 40-59 | 6(50.0) | 6(50.0) |
| ≥60 | 7(58.3) | 5(41.7) |
| Stage  N(%) | T1N0M0 | 8(57.1) | 6(42.9) | *p*=0.561 |
| T2N0M0 | 5(45.5) | 6(54.5) |
| Molecular subtypes  N(%) | LumA | 2(33.3) | 4(66.7) | *p*=0.712 |
| LumB | 7(53.8) | 6(46.2) |
| Her2 | 2(66.7) | 1(33.3) |
| Basal | 2(66.7) | 1(33.3) |
| **Time of DMFS**  N(%) | Metastasis within 3 years | 2(100.0) | 0(0.0) | ***p*=0.023** |
| Metastasis after 3 years | 5(83.3) | 1(16.7) |
| Non-metastasis | 5(29.4) | 12(70.6) |

a*p* values were derived from chi-square test

**Bold figure note:** this variable is statistically significant.

**Supplementary Figure S1. The lower *ADAMTS8* expression was related** **to poorer prognostic clinical stage and PAM50 subtypes, and shorter time of DMFS time in GSE20685 dataset.** (A) PAM50 gene expression hierarchical in a heatmap. (B, C, D) Boxplots showing the distribution of *ADAMTS8* expression in patients stratified by the clinical stage, PAM50 subtypes and DMFS time performance status. **
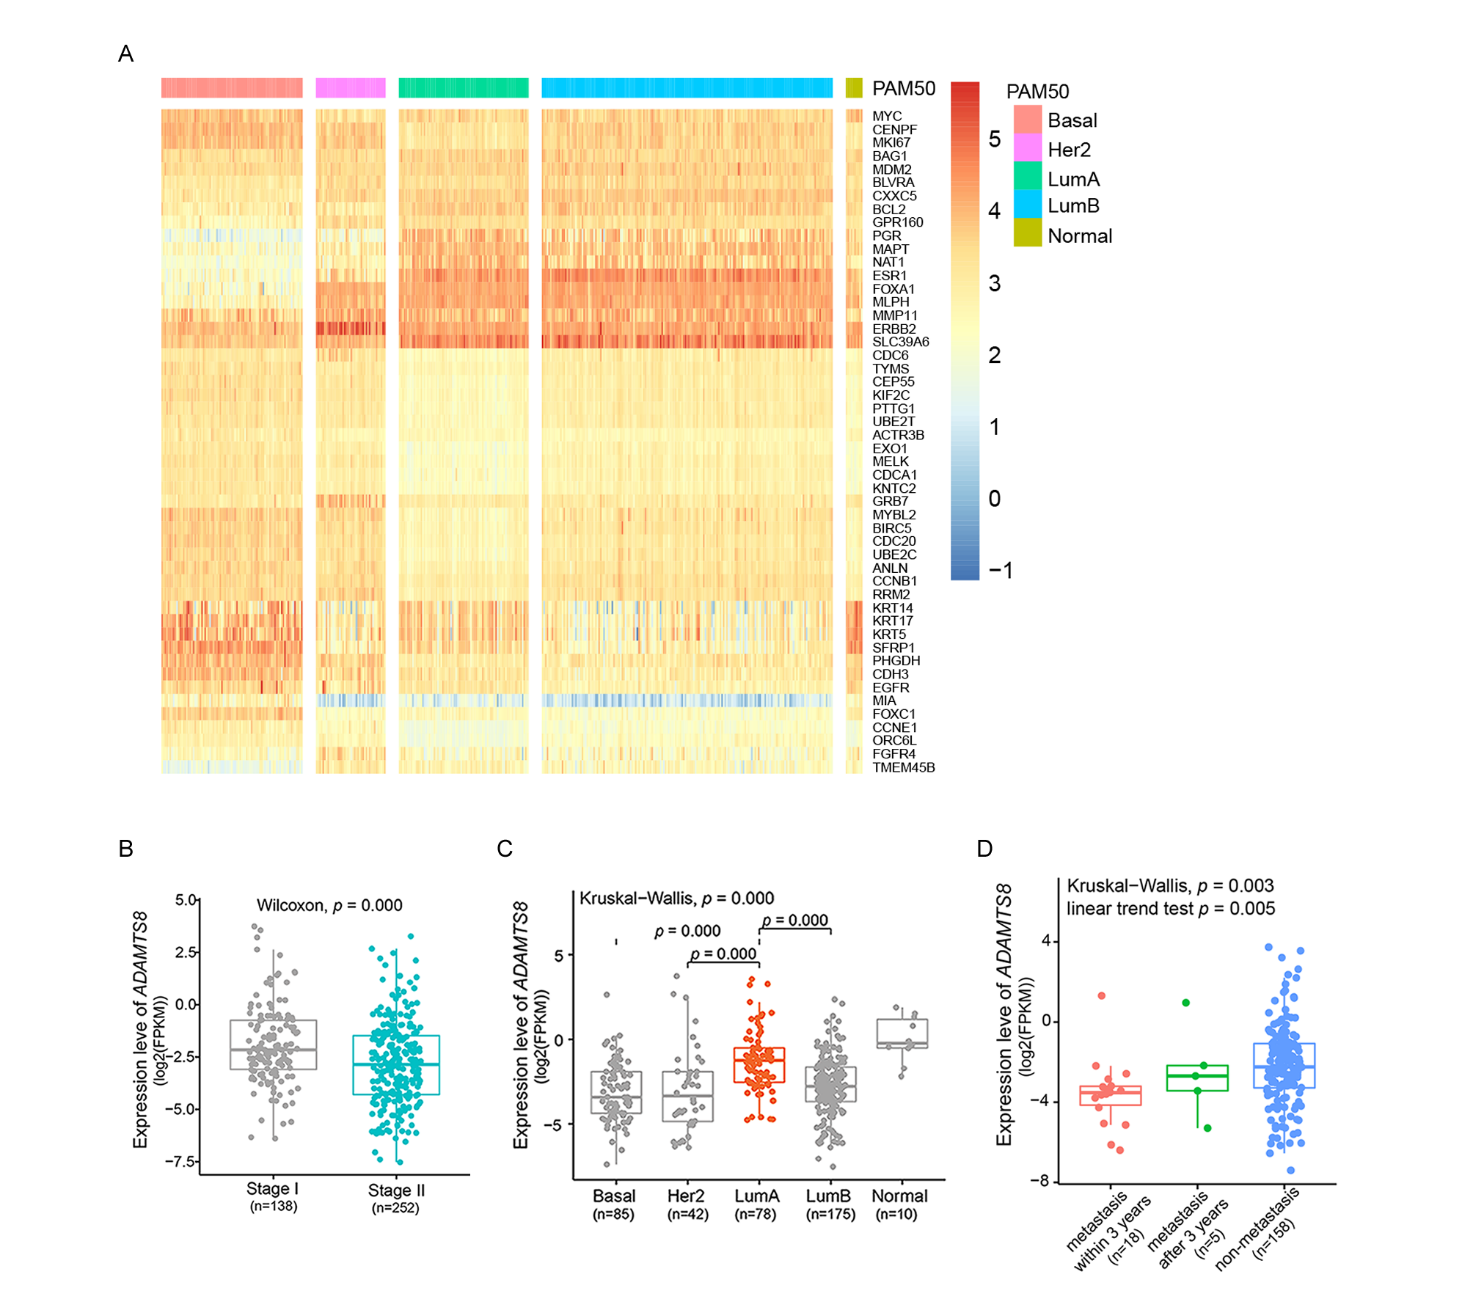
**
